# Supplementary material for: Calculating site-specific evolutionary rates at the amino-acid or codon level yields similar rate estimates
Source: PeerJ journal article supplement (doi:10.7717/peerj.3391), 2017-05-30

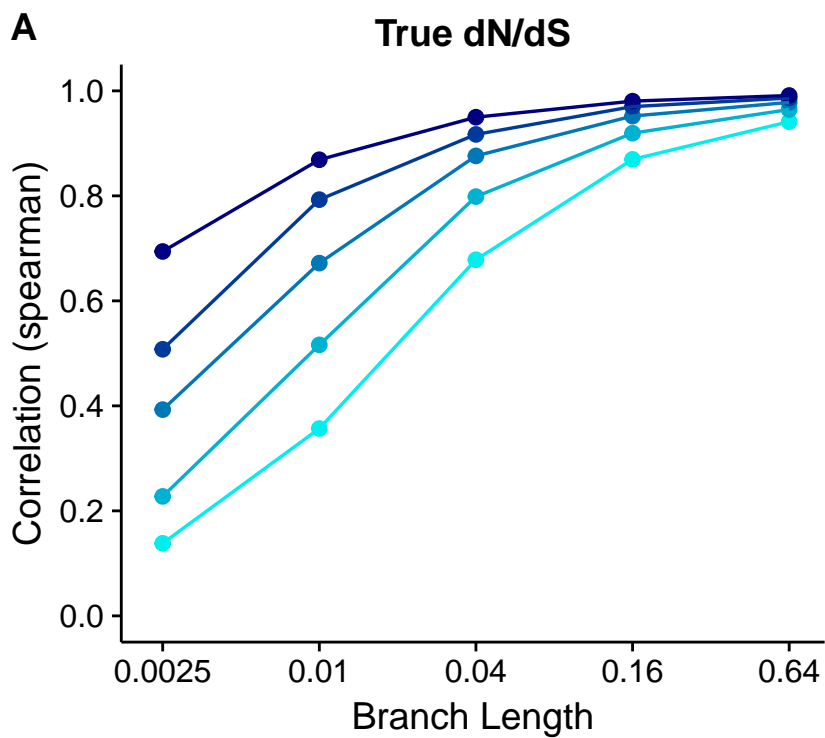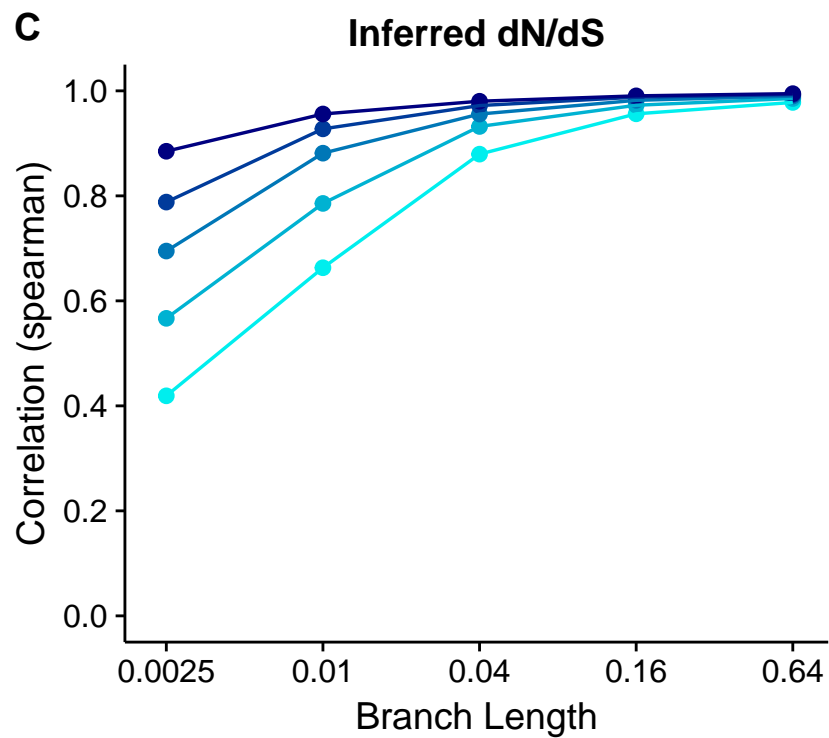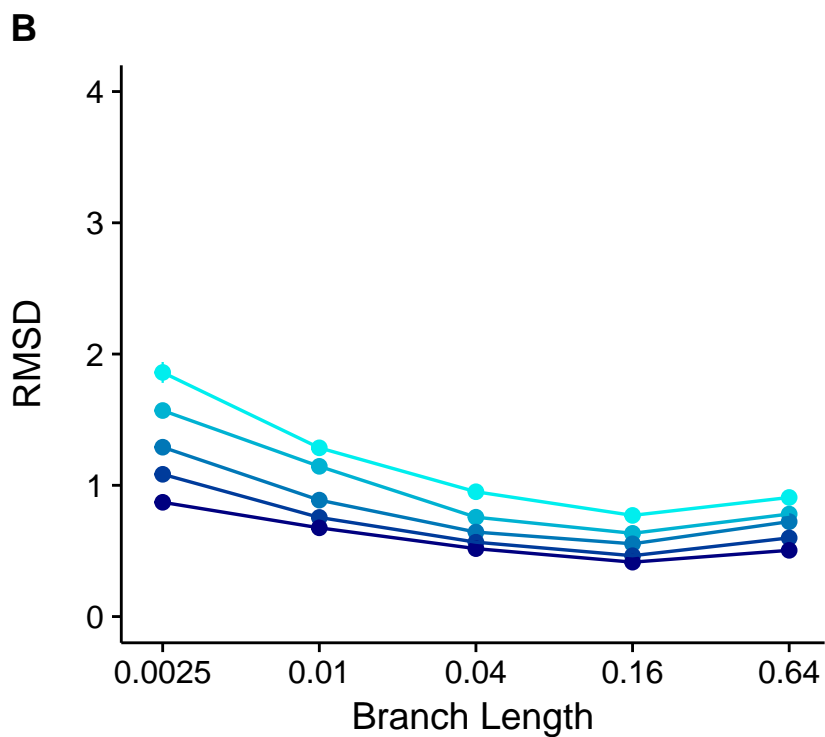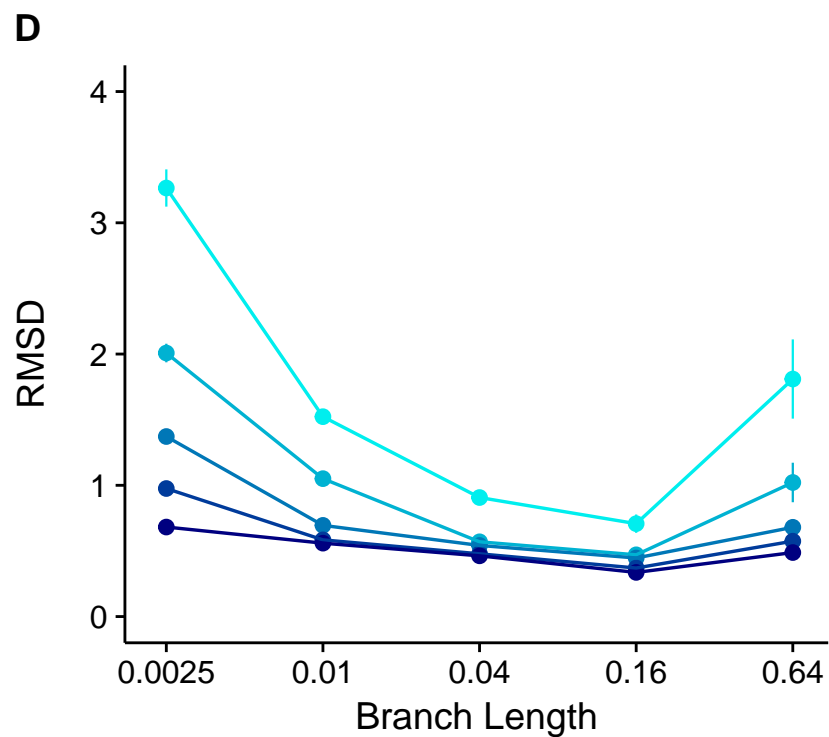

Supplement: figS2_r4s_v_dNdS_gamma2.pdf [file figS2_r4s_v_dNdS_gamma2.pdf]
