# Supplementary material for: Calculating site-specific evolutionary rates at the amino-acid or codon level yields similar rate estimates
Source: PeerJ journal article supplement (doi:10.7717/peerj.3391), 2017-05-30
Supplement: figS4_r4s_v_dNdS_gamma5.pdf [file figS4_r4s_v_dNdS_gamma5.pdf]

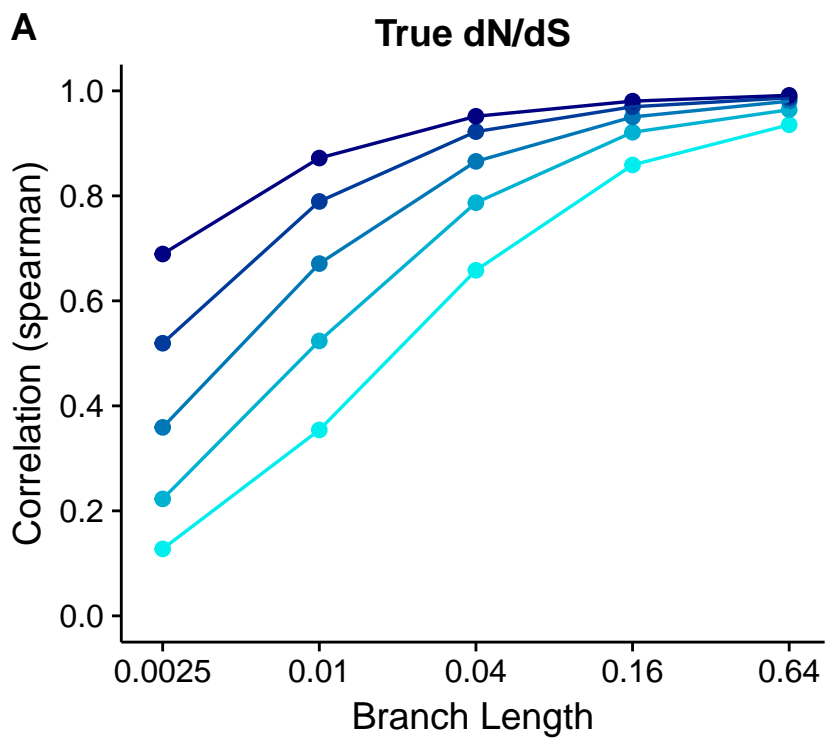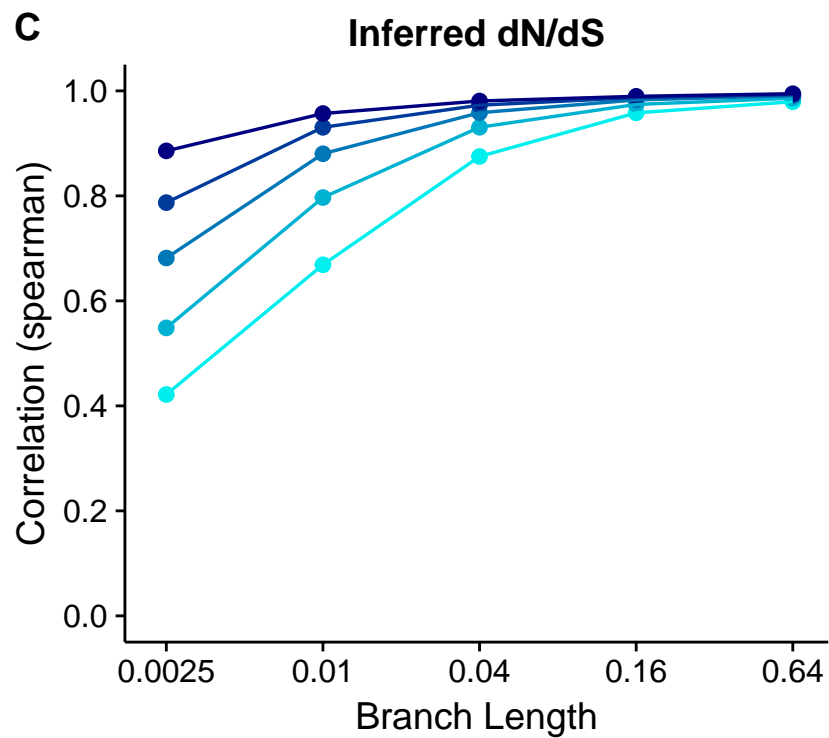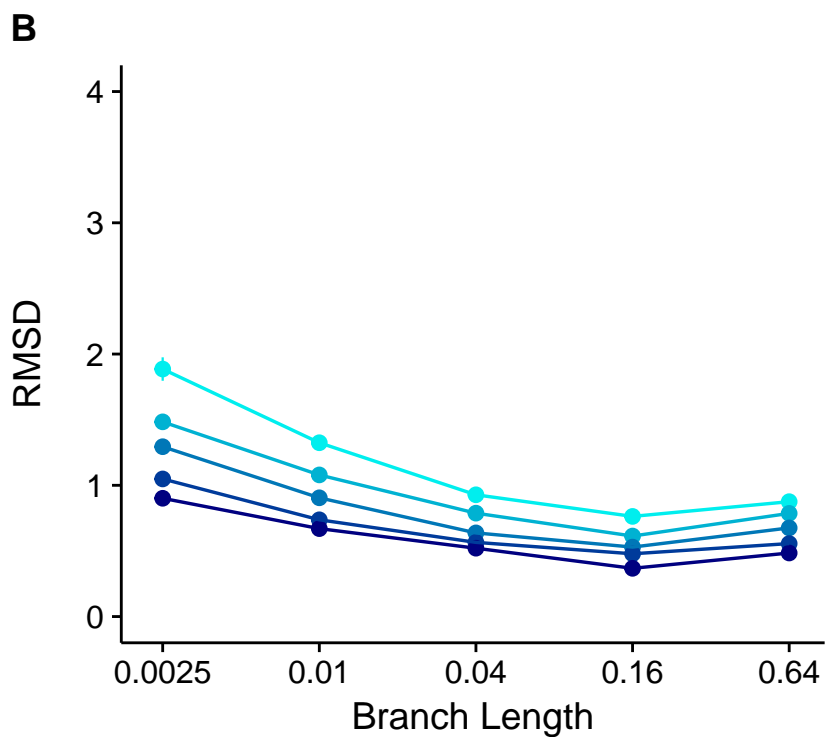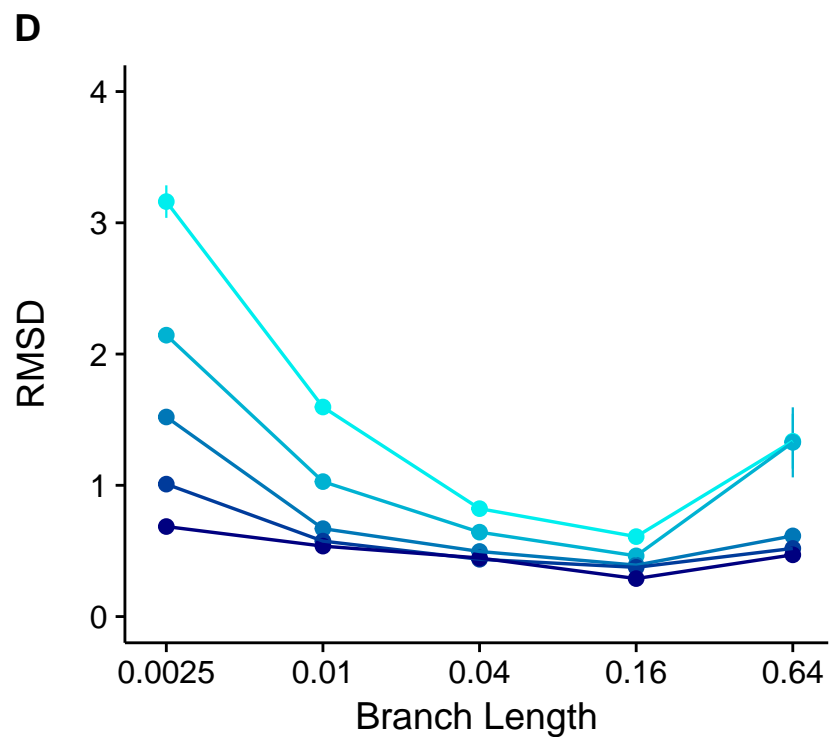

Number of Taxa

- 256
- 128
- 64
- 32
- 16
