# Supplementary material for: Calculating site-specific evolutionary rates at the amino-acid or codon level yields similar rate estimates
Source: PeerJ journal article supplement (doi:10.7717/peerj.3391), 2017-05-30

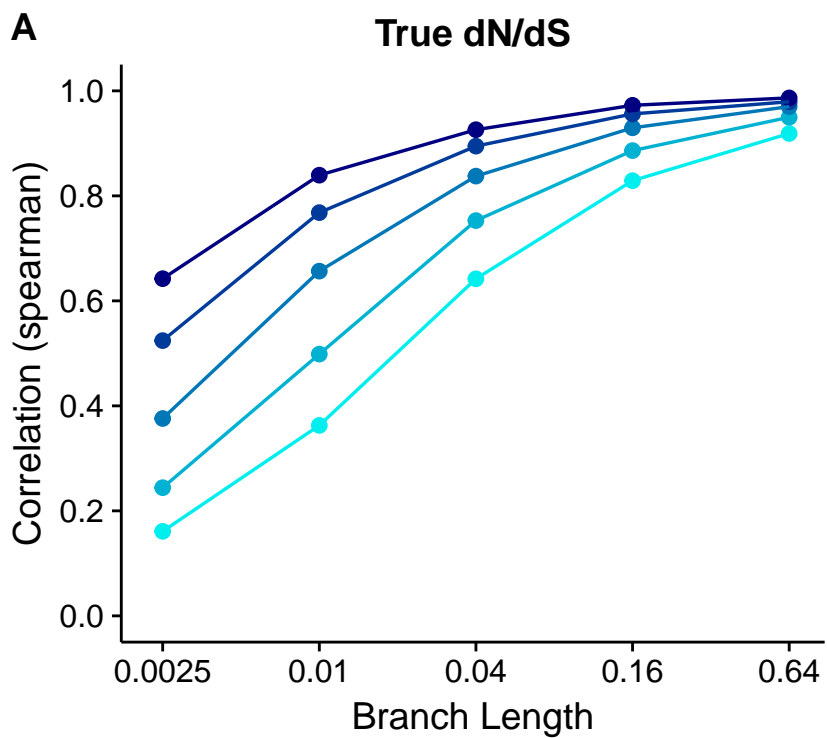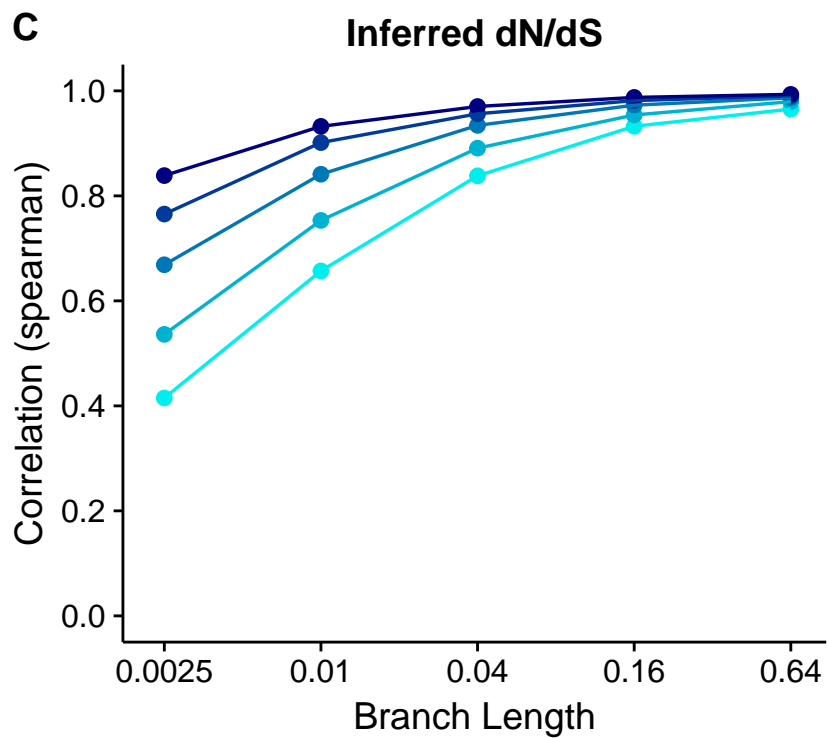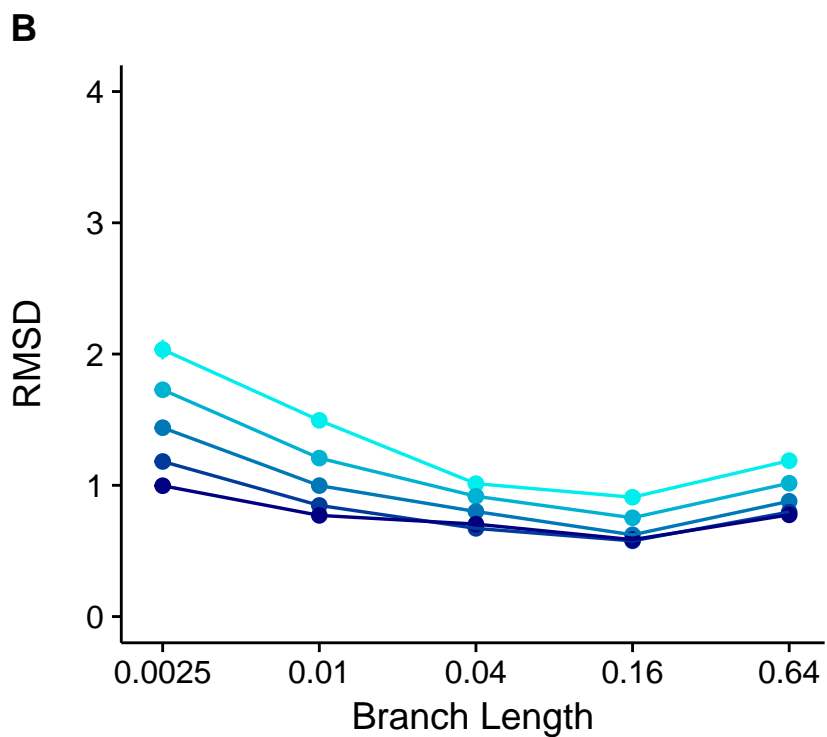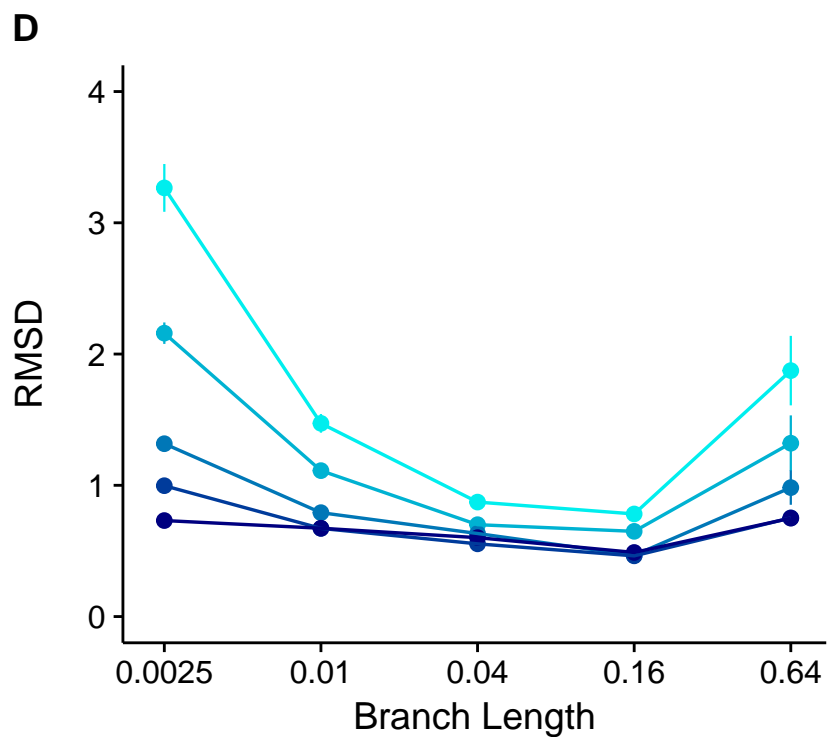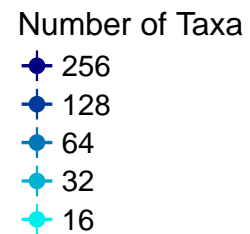

Supplement: figS5_r4s_v_dNdS_gamma6.pdf [file figS5_r4s_v_dNdS_gamma6.pdf]
